# Supplementary material for: Least Squares Twin Support Vector Machines to Classify End-Point Phosphorus Content in BOF Steelmaking
Source: MDPI journal article supplement (doi:10.3390/met12020268), 2022-01-31
Supplement: s1 [file s1]

## Article

# Least Squares Twin Support Vector Machines to Classify End-Point Phosphorus Content in BOF Steelmaking—Supplementary Materials

Heng Li <sup>1</sup>, Sandip Barui <sup>2</sup>, Sankha Mukherjee <sup>3</sup> and Kinnor Chattopadhyay <sup>1,\*</sup>

<sup>1</sup> Department of Materials Science and Engineering, University of Toronto, 184 College Street, Toronto, ON, Canada M5S3E4; adali.li@mail.utoronto.ca;

<sup>2</sup> Quantitative Methods and Operations Management Area, Indian Institute of Management Kozhikode, Kozhikode, 673570 India; sandipbarui@iimk.ac.in;

<sup>3</sup> Department of Metallurgical and Materials Engineering, Indian Institute of Technology Kharagpur, Kharagpur, West Bengal 721302, India; sankha@metal.iitkgp.ac.in

\* Correspondence: kinnor.chattopadhyay@utoronto.ca; Tel.: +1-(416)-978-6267

**Citation:** Li, H.; Barui, S.; Mukherjee, S.; Chattopadhyay, K. Least Squares Twin Support Vector Machines to Classify End-Point Phosphorus Content in BOF Steelmaking. *Metals* **2022**, *12*, 268. <https://doi.org/10.3390/met12020268>

Academic Editors: Pasquale Cavaliere

Received: 31 December 2021

Accepted: 28 January 2022

Published: 31 January 2022

**Publisher's Note:** MDPI stays neutral with regard to jurisdictional claims in published maps and institutional affiliations.

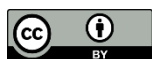

**Copyright:** © 2022 by the authors. Licensee MDPI, Basel, Switzerland. This article is an open access article distributed under the terms and conditions of the Creative Commons Attribution (CC BY) license (<https://creativecommons.org/licenses/by/4.0/>).

**Table S1.** List of candidate models to predict dephosphorization in steel.

| Model            | Equation                                                                                                                                                                                                                                                                                                                       |
|------------------|--------------------------------------------------------------------------------------------------------------------------------------------------------------------------------------------------------------------------------------------------------------------------------------------------------------------------------|
| [M1]<br>[1,2]    | $\hat{l}_p = 0.06[(\%CaO) + 0.37(\%MgO) + 4.65(\%P_2O_5) - 0.05(\%Al_2O_3) - 0.2(\%SiO_2)] - 10.52$<br>$+ 2.5 \log(\%Fe. total) + \frac{11570}{Temp}$                                                                                                                                                                          |
| [M2]<br>[1,2]    | $\hat{l}_p = 0.0680[(\%CaO) + 0.42(\%MgO) + 1.16(\%P_2O_5) + 0.2(\%MnO)] + \frac{11570}{Temp} - 10.52 + 2.5 \log(\%Fe. total)$                                                                                                                                                                                                 |
| [M3]<br>[3]      | $\hat{l}_p = 0.07(\%CaO) + 0.031(\%MgO) + 0.31(\%Al_2O_3) + 0.02(\%MnO) + \frac{10911}{Temp} - 11.4 + 2.84 \log(\%Fe. total)$                                                                                                                                                                                                  |
| [M4]<br>[3]      | $\hat{l}_p = 0.026(\%CaO) + 0.092(\%MgO) + 0.08(\%Al_2O_3) + 0.04(\%MnO) + \frac{12217}{Temp} - 6.29$<br>$+ 0.35 \log(\%Fe. total)$                                                                                                                                                                                            |
| [M5]<br>[3]      | $\hat{l}_p = 0.075(\%CaO) + 0.025(\%MgO) + 0.3(\%Al_2O_3) + 0.14(\%MnO) + \frac{6042}{Temp} - 10.27 + 3.5 \log(\%Fe. total)$                                                                                                                                                                                                   |
| [M6]<br>[4]      | $\hat{l}_p = 0.431[(\%CaO)/(\%SiO_2)] - 0.361 \log(\%MgO) + \frac{13590}{Temp} - 5.71 + 0.384 \log(\%Fe. total)$                                                                                                                                                                                                               |
| [M7]<br>[5]      | $\hat{l}_p = 0.072[(\%CaO) + 0.15(\%MgO) + 0.6(\%P_2O_5) + 0.6(\%MnO)] + \frac{11570}{Temp} - 10.50 + 2.5 \log(\%Fe. total)$                                                                                                                                                                                                   |
| [M8]<br>[6]      | $\hat{l}_p = 5.89 \log(\%CaO) + 0.5 \log(\%P_2O_5) + 0.6(\%MnO) + \frac{15340}{Temp} - 18.542 + 2.5 \log(\%Fe. total)$                                                                                                                                                                                                         |
| [M9]<br>[7]      | $\hat{l}_p = 0.056 \log(\%CaO) + 0.5 \log(\%P_2O_5) + \frac{12000}{Temp} - 10.42 + 2.5 \log(\%Fe. total)$                                                                                                                                                                                                                      |
| [M10]<br>[8]     | $\hat{l}_p = 5.6 \log(\%CaO) + \frac{22350}{Temp} - 21.876 + 2.5 \log(\%Fe. total)$                                                                                                                                                                                                                                            |
| [M11]<br>[9,10]  | $\hat{l}_p = 0.5 \log(\%P_2O_5) + \frac{12625}{Temp} - 7.787 + 2.5 \log(\%Fe. total)$                                                                                                                                                                                                                                          |
| [M12]<br>[11–13] | $\hat{l}_p = 5.9 \log(\%CaO) + 0.5 \log(\%P_2O_5) - 0.00461Temp - 2.0845 + 2.5 \log(\%Fe. total)$                                                                                                                                                                                                                              |
| [M13]<br>[11–13] | $\hat{l}_p = 5.39 \log(\%CaO) + 0.5 \log(\%P_2O_5) - 0.00447Temp - 3.0355 + 2.5 \log(\%Fe. total)$                                                                                                                                                                                                                             |
| [M14]<br>[4]     | $\hat{l}_p = 0.346[(\%CaO)/(\%SiO_2)] - 0.144 \log(\%MgO) + \frac{10173}{Temp} - 5.41 + 0.855 \log(\%Fe. total)$<br>$+ 0.0088 \log(\%C)$                                                                                                                                                                                       |
| [M15]<br>[14]    | $\hat{l}_p = 0.0023(\%CaO) - 0.0094(\%MgO) - 0.1910(\%C) + \frac{9736}{Temp} - 3.297 + 0.00053(\%Fe_tO)$                                                                                                                                                                                                                       |
| [M16]<br>[14]    | $\hat{l}_p = 0.0066(\%CaO) - 0.0123(\%MgO) - 1.2270(\%C) + \frac{11913}{Temp} - 4.384 + 0.00426(\%Fe_tO)$                                                                                                                                                                                                                      |
| [M17]<br>[15]    | $\hat{l}_p = 0.13(\%C) + \frac{20000}{Temp} - 12.24 + 2.5 \log(\%Fe_tO) + 6.65 \log\left(\frac{(\%CaO) + 0.8(\%MgO)}{(\%SiO_2) + (\%Al_2O_3) + 0.8(\%P_2O_5)}\right)$                                                                                                                                                          |
| [M18]<br>[16,17] | $\hat{l}_p = 0.0715[(\%CaO) + 0.25(\%MgO)] + \frac{7710.2}{Temp} - 8.55 + 2.5 \log(\%Fe. total) + \left(\frac{105.1}{Temp} + .0723\right)(\%C)$                                                                                                                                                                                |
| [M19]<br>[4]     | $\hat{l}_p = \frac{13958}{Temp} - 7.9517 + 2.5 \log(\%Fe_tO) - (\%Fe_tO)(0.0143 + 0.0001032(\%Fe_tO)) - 0.36$                                                                                                                                                                                                                  |
| [M20]<br>[18]    | $\hat{l}_p = 3.52 \log(\%CaO) + 2.5 \log(\%FeO) + 0.5 \log(\%P_2O_5) + \frac{4977}{Temp + 17.8} - 10.46$                                                                                                                                                                                                                       |
| [M21]<br>[19,20] | $\hat{l}_p = 1.53126 \log(\%FeO) - 6.909 + \frac{12940}{Temp}$<br>$+ 33.23369 \log(\%CaO) - 5.3505 + \log\left(\frac{1.6 + \sqrt{1.28 + (\%P)} - 1.6(0.64 + (\%P))^{0.5}}{1.82}\right)$<br>$- \left(\frac{0.00129(\%Al_2O_3) + 0.00098(\%TiO_2) + 0.00026(\%V_2O_5)}{(\%SiO_2) + (\%Al_2O_3) + (\%V_2O_5) + (\%TiO_2)}\right)$ |

|               |                                                                                                                               |
|---------------|-------------------------------------------------------------------------------------------------------------------------------|
| [M22]<br>[4]  | $\hat{L}_p = 0.6639[(\%CaO)/(\%SiO_2)] + \frac{8198.1}{Temp} - 3.113 + 0.3956 \log(\%Fe_{total}) + 0.2075 \log(\%C)$          |
| [M23]<br>[21] | $\hat{L}_p = 0.5[162(\%CaO) + 127.5(\%MgO) + 28.5(\%MnO)] + \frac{11000}{Temp} - 0.000628(SiO_2)^2 + 2.5 \log(\%FeO) - 10.76$ |
| [M24]<br>[22] | $\hat{L}_p = 0.08(\%CaO) + 2.5 \log(\%Fe_tO) + \frac{22350}{Temp} - 16.0$                                                     |
| [M25]<br>[22] | $\hat{L}_p = 7 \log(\%CaO) + 2.5 \log(\%Fe_tO) + \frac{22350}{Temp} - 24.0$                                                   |

## References

- Assis, A.; Fruehan, R.; Sridhar, S. Phosphorus equilibrium between liquid iron and CaOSiO<sub>2</sub>-MgO-FeO slags. In Proceedings of the AISTech 2012 Iron and Steel Technology Conference and Exposition, Georgia, GA, USA, 7 May 2012; pp. 861–870.
- Assis, A.N.; Fruehan, R. Phosphorus removal in oxygen steelmaking: A comparison between plant and laboratory data. In Proceedings of the AISTech 2013 Iron and Steel Technology Conference, Pittsburgh, PA, USA, 6 May 2013; pp. 889–895.
- Chattopadhyay, K.; Kumar, S. Application of thermodynamic analysis for developing strategies 496 to improve BOF steelmaking process capability. In Proceedings of the AISTech 2013 Iron and 497 Steel Technology Conference, Pittsburgh, PA, USA, 6 May 2013; pp. 809–819.
- Urban, D.I.W.; Weinberg, I.M.; Cappel, I.J. De-phosphorization strategies and modelling in oxygen steelmaking. *Iron Steel Technol.* **2014**, *134*, pp. 27–39.
- Ide, K.; Fruehan, R. Evaluation of phosphorus reaction equilibrium in steelmaking. *Iron Steelmak.* **2000**, *27*, pp. 65–70.
- Ikedo, T.; Matsuo, T. The dephosphorization of hot metal outside the steelmaking furnace. *Trans. Iron Steel Inst. Jpn.* **1982**, *22*, pp. 495–503.
- Ito, Y.; Sato, S.; Kawachi, Y.; Tezuka, H. Dephosphorization in LD converter with low Si hot metal-develop of minimum slag practice. *Tetsu-Hagané* **1979**, *65*, pp. S737.
- Kawai, Y.; Takahashi, I.; Miyashita, Y.; Tachibana, K. For dephosphorization equilibrium between slag and molten steel in the converter furnace. *Tetsu-Hagané* **1977**, *63*, pp. S156.
- Turkdogan, E.; Pearson, J. Reaction equilibria between metal and slag in acid and basic open-hearth steelmaking. *J. Iron Steel Inst.* **1954**, *176*, pp. 59–63.
- Turkdogan, E.; Pearson, J. Activities of constituents of iron and steelmaking slags. *JISI* **1953**, *175*, pp. 398–401.
- Balajiva, K.; Quarrell, A.; Vajragupta, P. A laboratory investigation of the phosphorus reaction in the basic steelmaking process. *J. Iron Steel Inst.* **1946**, *153*, pp. 115.
- Balajiva, K.; Vajragupta, P. The effect of temperature on the phosphorus reaction in the basic steelmaking process. *J. Iron Steel Inst.* **1947**, *155*, pp. 563–567.
- Vajragupta, P. Note on further work on the phosphorus reaction in basic steelmaking. *J. Iron Steel Inst.* **1948**, *158*, pp. 494–496.
- Sipos, K.; Alvez, E. Dephosphorization in BOF steelmaking. In Proceedings of the Molten 2009: VIII International Conference on Molten Slags, Fluxes and Salts, Santiago, Chile, 18–21 January 2009; GECAMIN: Santiago, Chile, 2009; pp. 1023–1030.
- Lee, C.; Fruehan, R. Phosphorus equilibrium between hot metal and slag. *Ironmak. Steelmak.* **2005**, *32*, pp. 503–508.
- Ogawa, Y.; Yano, M.; Kitamura, S.; Hirata, H. Development of the continuous dephosphorization and decarburization process using BOF. *Tetsu-Hagané* **2001**, *87*, pp. 21–28.
- Ogawa, Y.; Yano, M.; Kitamura, S.Y.; Hirata, H. Development of the continuous dephosphorization and decarburization process using BOF. *Steel Res. Int.* **2003**, *74*, pp. 70–76.
- Bloom, T. The influence of phosphorus on the properties of sheet steel products and methods used to control steel phosphorus level in steel product manufacturing. *Iron Steelmak.* **1990**, *17*, pp. 35–41.
- Selin, R. Studies on MgO solubility in complex steelmaking slags in equilibrium with liquid iron and distribution of phosphorus and vanadium between slag and metal at MgO saturation. I. Reference System CaO–FeO–MgO sub sat–SiO sub 2. *Scand. J. Metall. (Den.)* **1991**, *20*, pp. 279–299.
- Selin, R. The Role of Phosphorus, Vanadium and Slag Forming Oxides in Direct Reduction Based Steelmaking; Royal Institute of Technology: Stockholm, Sweden, 1990.
- Zhang, X.; Sommerville, I.; Toguri, J. An equation for the equilibrium distribution of phosphorus between basic slags and steel. *J. Met.* **1983**, *35*, pp. 93.
- Healy, G. New look at phosphorus distribution. *J. Iron Steel Inst.* **1970**, *208*, pp. 664–668.
